# Supplementary material for: Investigation into the effect of Fe-site substitution on the performance of Sr2Fe1.5Mo0.5O6−δ anodes for SOFCs
Source: Royal Society of Chemistry journal article supplement (doi:10.1039/c4ta03216k), 2014-01-01
Supplement: c4ta03216k1.pdf [file c4ta03216k1.pdf]

## Supporting Information

### Investigation into the effect of Fe-site substitution on the performance of $\text{Sr}_2\text{Fe}_{1.5}\text{Mo}_{0.5}\text{O}_{6-\delta}$ anode for SOFC

Jie Feng,<sup>a</sup> Guoquan Yang,<sup>a</sup> Ningning Dai,<sup>a</sup> Zhenhua Wang,<sup>a</sup> Wang Sun,<sup>a</sup> David Rooney,<sup>b</sup> Jinshuo Qiao<sup>\*,a</sup> and Kening Sun<sup>\*,a</sup>

<sup>a</sup> Beijing Key Laboratory for Chemical Power Source and Green Catalysis, School of Chemical Engineering and Environment, Beijing Institute of Technology, Beijing, 100081, China

<sup>b</sup> School of Chemistry and Chemical Engineering, Queen's University Belfast, Belfast, Northern Ireland BT9 5AG, United Kingdom

E-mail: qjinshuo@bit.edu.cn; bitkeningsun@163.com; Tel&Fax: 0086-10-68918696

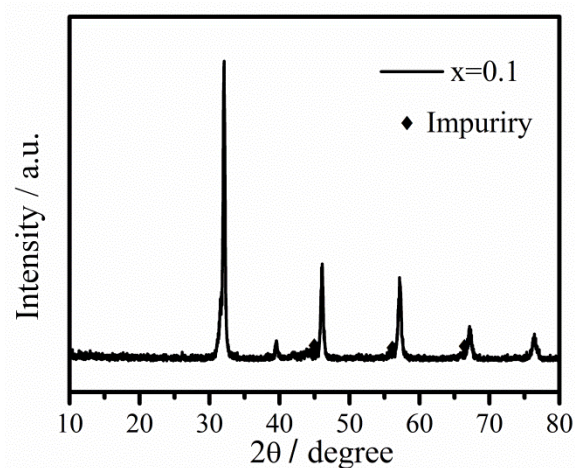

**Figure S1.** XRD patterns of SFNM0.1 powder after reduction in  $\text{H}_2$  at 800 °C for 3 h.

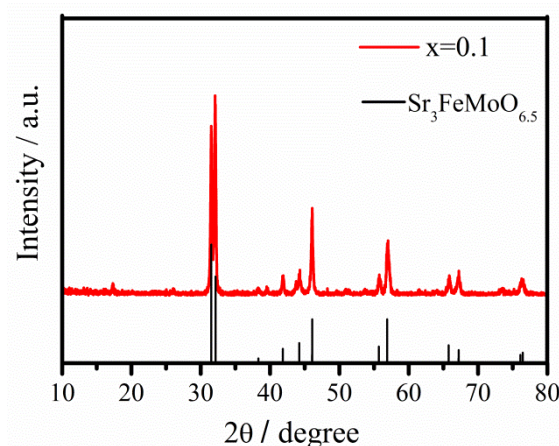

**Figure S2.** XRD patterns of SFNM0.1 powder after reduction in  $\text{H}_2$  at 800 °C for 24 h.

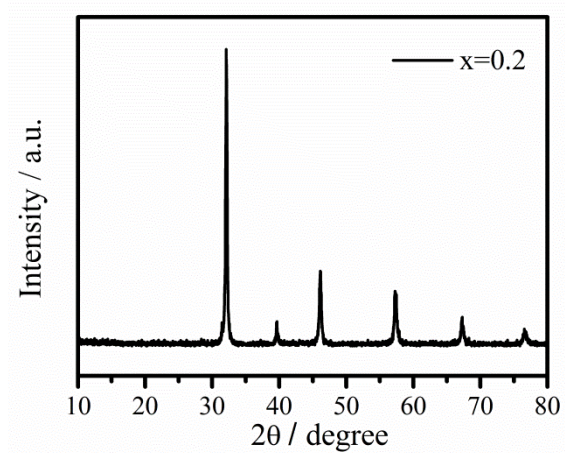

**Figure S3.** XRD patterns of re-oxidized SFNM0.2 sample in air at 800 °C for 10 h.
